# Supplementary material for: Functional Interaction Between S100A1 and MDM2 May Modulate p53 Signaling in Normal and Malignant Endometrial Cells
Source: Research Square preprint supplement (doi:10.21203/rs.3.rs-1026301/v1), 2021-11-10
Supplement: Supplementary file 2 [file 9337c75eb75744bd8b70ff6b.xlsx]

## Sheet: Sheet1
	Table 1. Primer sequences for functional analysis of S100 gene family members used in this study
	Assay	Gene		Sequence	size
	RT-PCR (mRNA)	S100A1	Forward	5'-ATGGGCTCTGAGCTGGAGAC-3'	285 bp
			Reverse	5'-TCAACTGTTCTCCCAGAAGAAAT-3'
		S100A2	Forward	5'-ATGATGTGCAGTTCTCTGGAGC-3'	297 bp
			Reverse	5'-TCAGGGTCGGTCTGGGCAGC-3'
		S100A3	Forward	5'-AGTGAGGATGGCCAGGCCTCTG-3'	323 bp
			Reverse	5'-GGAGCAGAGGCTACTGGGAGCA-3'
		S100A4	Forward	5'-GCCACCATGGCGTGCCCTCTGGAGAA-3'	306 bp
			Reverse	5'-TCATTTCTTCCTGGGCTGCTTATCTG-3'
		S100A5	Forward	5'-ACACTGTGATGGAGACTCCTCT-3'	287bp
			Reverse	5'-TCACTTGTTGTCCTCTAGAAAGAAGT-3'
		S100A6	Forward	5'-ATGGCATGCCCCCTGGATCAG-3'	273bp
			Reverse	5'-TCAGCCCTTGAGGGCTTCATT-3'
		S100A7	Forward	5'-ATGAGCAACACTCAAGCTGAGAGGT-3'	306 bp
			Reverse	5'-TCACTGGCTGCCCCCGGAACAG-3'
		S100A8	Forward	5'-ATGTTGACCGAGCTGGAGAAAG-3'	282 bp
			Reverse	5'-CTACTCTTTGTGGCTTTCTTCATGG-3'
		S100A9	Forward	5'-ATGACTTGCAAAATGTCGCAGCTGG-3'	350 bp
			Reverse	5'-TGGTCTTAGGGGGTGCCCTCC-3'
		S100A10	Forward	5'-CACCAAAATGCCATCTCAAATGG-3'	303 bp
			Reverse	5'-GCCTACTTCTTTCCCTTCTGCT-3'
		S100A11	Forward	5'-ATGGCAAAAATCTCCAGCCCTACAG-3'	318 bp
			Reverse	5'-TCAGGTCCGCTTCGGGAAGGG-3'
		S100A12	Forward	5'-ATGACAAAACTTGAAGAGCATCTGG-3'	279bp
			Reverse	5'-CTACTCTTTGTGGGTGTGGTAATGG-3'
		S100A13	Forward	5'-ATGGCAGCAGAACCACTGAC-3'	297 bp
			Reverse	5'-TTACTTCTTCCTGATCTTCAGGTCT-3'
		S100B	Forward	5'-ATGTCTGAGCTGGAGAAGGC-3'	279 bp
			Reverse	5'-TCACTCATGTTCAAAGAACTCGTGG-3'
		CALB3(S100G)	Forward	5'-ATGAGTACTAAAAAGTCTCCTGAGGA-3'	256 bp
			Reverse	5'-TATTTTGTTTTCTCCTTCACTGGGA-3'
		S100P	Forward	5'-ATGACGGAACTAGAGACAGCCAT-3'	288 bp
			Reverse	5'-TCATTTGAGTCCTGCCTTCTCAAAG-3'
	FLAG-tagged cDNA	S100A1	Forward	5'-CGCAAATGGGCGGTAGGCGTG-3'
			Reverse	5'-GAACTGTTCTCCCAGAAGAA-3'
	shRNA	S100A1	Forward	5'-gatccgGAGACCCTCATCAACGTGTTttcaagagaAACACGTTGATGAGGGTCTCttttttg-3'
			Reverse	5'-aattcaaaaaaGAGACCCTCATCAACGTGTTtctcttgaaAACACGTTGATGAGGGTCTCcg-3'
