# Supplementary material for: Functional Interaction Between S100A1 and MDM2 May Modulate p53 Signaling in Normal and Malignant Endometrial Cells
Source: Research Square preprint supplement (doi:10.21203/rs.3.rs-1026301/v1), 2021-11-10
Supplement: Supplementary file 3 [file 31905ecea11d6ad93a07fafe.xlsx]

## Sheet: Sheet1
	Table 2 Correlations among S100A1 and its related markers in normal and malignant endometrial lesions
			S100A1	p53	MDM2	p21waf1	Ki-67
			r (P)	r (P)	r (P)	r (P)	r (P)
	Normal endometrium
		p53	0.12	*	*	*	*
			(0.4)
		MDM2	0.44	0.14	*	*	*
			(0.007)	(0.4)
		p21waf1	0.4	0.36	0.46	*	*
			(0.03)	(0.03)	(0.0006)
		Ki-67	-0.45	0.51	-0.06	0.08	*
			(0.04)	(0.03)	(0.7)	(0.7)
		Apoptosis	0.39	0.53	0.17	0.45	-0.11
			(0.06)	(0.001)	(0.28)	(0.006)	(0.6)
	Malignant endometrium
		p53	0.2	*	*	*	*
			(0.06)
		MDM2	0.05	0.09	*	*	*
			(0.6)	(0.4)
		p21waf1	0.24	0.26	0.35	*	*
			(0.02)	(0.01)	(0.001)
		Ki-67	0.09	0.42	-0.06	0.36	*
			(0.3)	(<0.0001)	(0.6)	(0.0006)
		cPARP1	0.17	0.49	-0.14	0.27	0.66
			(0.1)	(<0.0001)	(0.2)	(0.01)	(<0.0001)
